# 1 **Disruption of fish gut microbiota composition and holobiont's metabolome by cyanobacterial blooms**

2

3 Alison Gallet<sup>1</sup>, Sébastien Halary<sup>1</sup>, Charlotte Duval<sup>1</sup>, Hélène Huet<sup>3</sup>, Sébastien Duperron<sup>1,2,\*,§</sup>, Benjamin

4 Marie<sup>1,\*,§</sup>

5

6 <sup>1</sup>UMR7245 Molécules de Communication et Adaptation des Micro-organismes, Muséum National d'Histoire

7 Naturelle, CNRS, Paris, France

8 <sup>2</sup>Institut Universitaire de France, Paris, France

9 <sup>3</sup>UMR1161 Virologie, École Nationale Vétérinaire d'Alfort, INRA - ANSES - ENVA, Maisons-Alfort,

10 France

11

12

13

14 \* Corresponding authors: [sebastien.duperron@mnhn.fr](mailto:sebastien.duperron@mnhn.fr); [benjamin.marie@mnhn.fr](mailto:benjamin.marie@mnhn.fr)

15 § These authors equally contribute to this work

16

## 17 **Abstract**

### 18 **Background:**

19 Cyanobacterial blooms are one of the most common stress encountered by metazoans living in freshwater

20 lentic systems such as lakes and ponds. Blooms reportedly impair fish health, notably through oxygen

21 depletion and production of bioactive compounds including cyanotoxins. However, in the times of the

22 “microbiome revolution”, it is surprising that so little is still known regarding the influence of blooms on fish

23 microbiota. In this study, an experimental approach is used to demonstrate that blooms affect fish

24 microbiome composition and functions, as well as the metabolome of holobionts. To this end, the model

25 teleost *Oryzias latipes* is exposed to simulated *Microcystis aeruginosa* blooms of various intensities in a

26 microcosm setting, and the response of bacterial gut communities is evaluated in terms of composition,

27 metagenome-encoded functions and metabolome profiling.

### 28 **Results:**

29 The gut bacterial community of *O. latipes* exhibits marked responses to the presence of *M. aeruginosa*

30 blooms in a dose-dependent manner. Notably, abundant gut-associated Firmicutes almost disappear, while

31 potential opportunists increase. The holobiont's gut metabolome displays major changes, while functions

32 encoded in the metagenome of bacterial partners are more marginally affected. Bacterial communities tend to

33 return to original composition after the end of the bloom suggesting post-bloom resilience, and remain

34 sensitive in case of a second bloom, reflecting a highly reactive gut community.

### 35 **Conclusion:**

36 In the context of increasingly frequent and intense blooms worldwide, results point to the relevance of  
37 accounting for short- and long-term microbiome-related effects in fish ecology, with potential outcomes  
38 relevant to conservation biology as well as aquaculture.

39  
40 **Keywords:** cyanobacteria, gut microbiota, metagenomics, metabolomics, medaka fish

41  
42 **Background**

43  
44 Organisms living in lakes and ponds are exposed to cyanobacterial blooms throughout their life (1–4).  
45 Blooms are natural events, yet increased eutrophication and global change associated with human activities  
46 make them increasingly frequent, abundant and persistent worldwide (5, 6). Cyanobacterial blooms affect the  
47 whole ecosystem, including the health of teleost fish which occupy higher trophic levels (1, 2, 7).  
48 Cyanobacterial metabolites display a broad range of bioactivities and include various toxins, digestive  
49 enzyme inhibitors, antimicrobials, and cytotoxic compounds (8). As a consequence, cyanobacteria cells,  
50 extracts and purified cyanotoxins all induce deleterious effects on teleost fishes (2, 9–12). One of the most  
51 toxic and frequent cyanotoxins is microcystin-LR (MC-LR), a hepatotoxin that accumulates in fish liver with  
52 deleterious consequences for fish physiology and reproductive processes (13, 14). Aquatic animals are  
53 exposed to cyanobacteria and their toxins through oral ingestion and transfer absorption through the intestine  
54 (13, 15, 16). In this respect, the role of gut-associated microbiota in holobiont's response is currently  
55 underestimated (17). The gut microbiota has recently emerged as a primary target for microbiome-aware  
56 ecotoxicological concerns (18–22). However, a limited number of studies have investigated the effect of  
57 cyanobacterial blooms on fish gut microbiota (10, 23–25). Whole chemical extracts of few *Microcystis*  
58 strains were for example shown to influence the composition of gut bacterial communities of medaka fish in  
59 microcosm-based experiments, while MC-LR alone did not (24). This and few other works emphasize that  
60 metabolite cocktails and whole cells, rather than toxins alone (microcystins), should be considered for  
61 realistic assessment of the microbiome impairs (2, 13, 24), yet the effect of exposure to environmentally  
62 relevant levels of cyanobacteria has not been evaluated so far.

63 In the present study, the impact of a cyanobacterial bloom on the composition and functions of fish gut-  
64 associated bacterial communities, and on the metabolite composition in various host tissues is evaluated  
65 using an experimental approach. A teleost model fish, the medaka *Oryzias latipes*, has been exposed to three  
66 environmentally relevant concentrations of *Microcystis aeruginosa*, the most common bloom-forming  
67 cyanobacterium in temperate lentic freshwaters (26). A first 28-days exposure simulated a long bloom event.  
68 Because blooms are highly dynamic events in natural systems, post-bloom resilience was investigated. Then,  
69 the hypothesis of a priming effect, translating into a lower impact of a second bloom, was tested. To this end,  
70 a post-bloom depuration phase was conducted for 4 days, followed by a second exposure to the highest  
71 *M. aeruginosa* concentration for 5 days. Bacterial community compositions were characterized using 16S  
72 rRNA gene sequencing, and metabolite contents were profiled by LC-MS/MS. Metagenomes of unexposed  
73 control fish gut communities were compared to those of specimens exposed to the highest bloom level to

74 compare their respective annotated functions. Bacterial community and metabolites compositions were then  
75 compared using a multi-omics approach to identify correlation networks associated with holobiont response.  
76 By testing the effect of a cyanobacterial bloom on teleost gut bacterial microbiota, documenting holobiont  
77 post-bloom response, and investigating the effect of a second bloom, this study addresses for the first time  
78 the dynamics of holobiont response to cyanobacterial blooms.

79

## 80 **Methods**

81

### 82 **Experimental design and sampling**

83 Experimental procedures were carried out in accordance with European legislation on animal  
84 experimentation (European Union Directive 2010/63/EU) and were approved for ethical contentment by an  
85 independent ethical council (CEEAA Cuvier n°68) and authorized by the French government under reference  
86 number APAFiS#19316-2019032913284201 v1.

87 Experiments were performed in 10-liter aquaria (microcosms) with 7-months old adult male Japanese  
88 medaka fish *Oryzias latipes* provided by the AMAGEN platform (Gif-sur-Yvette, France). Before the whole  
89 experiment, five fish were sampled as controls for the histological analyses then fish were pre-acclimatized  
90 in clear water (2 weeks) in 15 aquaria, each one containing 8 fish. Prior to the first exposure at day 0, five  
91 fish were randomly sampled among the aquaria, and 10 mL of water of each aquarium were pooled, as  
92 references of initial fish and water conditions (d0, Fig. 1). Fish were then exposed for 28 days to five  
93 treatments: water (control, 0); water containing Z8 medium (27), *i.e.* the medium used to cultivate  
94 cyanobacteria (control, Z8); and water containing three environmentally relevant concentrations of live  
95 *Microcystis aeruginosa*, *i.e.* 1, 10 and 100  $\mu\text{g.L}^{-1}$  Chla (1, 10, 100), respectively (d28, Fig. 1). Each treatment  
96 was carried out in three aquaria (labelled a, b and c). At d28, four fish, 150 mL of water, bottom-growing  
97 biofilms and faeces were sampled in each aquarium. After sampling, remaining fish from each of the three  
98 aquaria exposed to one condition were pooled and transferred to a single aquarium, filled with clear water  
99 (treatment 0) for a 4-day depuration period of exactly 110 hours (d33, Fig. 1). At d33, three fish and 150 mL  
100 of water were sampled in each aquarium. All fish were then exposed in the same aquaria for 5 days (exactly  
101 134 hours) to the highest concentration of *M. aeruginosa*, 100  $\mu\text{g.L}^{-1}$  Chla (d39, Fig. 1). At d39, four fish,  
102 150 mL of water and faeces were sampled in each aquarium. Along the two successive exposures, 10 mL of  
103 *M. aeruginosa* culture were sampled every two days but only one sample per week was analysed further.  
104 Dataset S1 provides details of sampled individuals and performed analyses.

105

### 106 ***Microcystis aeruginosa* production**

107 Blooms were simulated in lab using the non-axenic and easy-to-cultivate *M. aeruginosa* mono-clonal strain  
108 PMC 728.11 maintained in the Paris Museum Collection which can produce diverse variants of bioactive  
109 metabolites (Supplementary Note 2). The strain was cultivated in Z8 medium at  $25 \pm 1$  °C with a 16h:8h  
110 light/dark cycle (at 14  $\mu\text{mol.m}^{-2}.\text{s}^{-1}$ ) in 2-liter bottles all along the experiment. The concentrations of  
111 *M. aeruginosa* were estimated using Chlorophyll *a* extraction (28) and absorbance measurements as a proxy

112 using a spectrophotometer (Cary 60 UV-Vis, Agilent). Every two days, after water renewal, *M. aeruginosa*  
113 was measured in each aquarium using a fluorometer (FluoroProbe III, bbe Moldaenke), and appropriate  
114 volume of the culture was added as per the desired final concentrations (1, 10 or 100  $\mu\text{g.L}^{-1}$  Chla).

115

#### 116 **Monitoring of experimental parameters**

117 Every second day throughout the experiment, water parameters were monitored (pH, temperature,  
118 conductivity, nitrates and nitrites), aquaria were cleaned (faeces removed by aspiration), half of the water  
119 was replaced with freshwater. On the same timeline, *M. aeruginosa* concentrations were measured and  
120 adjusted to maintain bloom levels in exposed treatments, and 1 milliliter of sterile Z8 medium was added in  
121 the Z8 treatment. Fish were exposed to constant temperature ( $23 \pm 1$  °C), pH ( $7.5 \pm 0.1$ ) and conductivity  
122 ( $234 \pm 22$   $\mu\text{S.cm}^{-1}$ ), to low levels of nitrates ( $\leq 1$   $\text{mg.L}^{-1}$ ) and nitrites ( $\leq 4$   $\text{mg.L}^{-1}$ ), to a 12h:12h light/dark  
123 cycle, and were fed twice daily with Nutra HP 0.3 (Skretting, Norway). Microcystin (MC) concentration was  
124 monitored on a regular basis in *M. aeruginosa*-containing treatments and quantified using enzyme-linked  
125 immunosorbent assay (ELISA) analyses (Microcystins-ADDA SAES ELISA, Eurofins Abraxis). Each  
126 sample was analysed in duplicates and MC concentrations were determined according to the MC-LR  
127 response standard curve.

128

#### 129 **Fish, *M. aeruginosa* culture, water, biofilm, food and faeces processing**

130 Fish were anesthetized in 0.1% tricaine methanesulfonate (MS-222; Sigma, St. Louis, MO) buffered with  
131 0.1%  $\text{NaHCO}_3$  and sacrificed. Whole guts, muscles and livers were dissected, flash-frozen in liquid nitrogen  
132 and stored at -80 °C. For histopathological examinations, livers from fish sampled before the whole  
133 experiment and at d28 and d39 (one fish per aquarium) were dissected, fixed in Davidson fixative as  
134 previously described(13), maintained for 24h at 4 °C then dehydrated in 70% ethanol and conserved at 4 °C.  
135 Livers samples were then embedded in paraffin and blocks were cut into 4  $\mu\text{m}$  thick sections, stained with  
136 Hematoxylin-Eosin-Saffron (HES), Periodic Acid Schiff (PAS) and Perls Prussian blue, and observed under  
137 photonic microscope (Zeiss, Germany). Aquarium water samples were filtered on a 0.22- $\mu\text{m}$  filter  
138 (Nucleopore Track-Etch Membrane) and frozen. *M. aeruginosa* culture (4 mL) and biofilm samples were  
139 centrifugated (10 min, 10 °C, 3,220 g) and pellets were frozen. Faeces pellets were directly frozen. A food  
140 sample was kept for DNA extraction.

141

#### 142 **Metabolites extraction**

143 Metabolite contents were extracted from fish livers, guts and muscles, *M. aeruginosa* cultures, and biofilms.  
144 Prior to sonication, muscles were freeze-dried then ground using a bead beater (TissueLyser II, Qiagen)  
145 while cultures and biofilms were only freeze-dried. Samples were weighted, then sonicated in 75% methanol  
146 (1 mL per 100 mg of tissue, 3x, on ice) and centrifuged (10 min, 4 °C, 15,300 g). Supernatants containing  
147 metabolite extracts were kept at -20 °C for mass spectrometry analyses. All pellets were discarded, except  
148 gut pellets dried and kept at -80 °C to perform a subsequent DNA extraction on the same gut tissue.

149

## 150 **Mass spectrometry data processing and analysis**

151 Each metabolite extract from fish livers, guts and muscles was analysed by Ultra high-performance liquid  
152 chromatography (UHPLC; ELUTE, Bruker) coupled with a high-resolution mass spectrometer (ESI-Qq-TOF  
153 Compact, Bruker) at 2 Hz speed, on simple MS mode then on broad-band Collision Ion Dissociation  
154 (bbCID) or autoMS/MS mode on the 50-1500  $m/z$  range. Three feature peak lists were generated from MS  
155 spectra within a retention time window of 1-15 minutes and a filtering of 5000 counts using MetaboScape  
156 4.0 software (Bruker). The three peak lists consisted of the area-under-the-peaks of extracted analytes from  
157 the three tissues (gut, liver, muscle) sampled at d28, d33 and d39, resulting in 1672, 909 and 3127 analytes,  
158 respectively. The genuine metabolite content of the culture was investigated on metabolite extracts using LC-  
159 MS/MS approach, combined with molecular network analysis and metabolite annotation using a  
160 cyanobacterial metabolite reference database, as previously described (29). Prior to analyses, Pareto scaling  
161 was applied on the datasets. Principal Component Analyses (PCA) were performed to compare the  
162 metabolite composition among groups using the *mixOmics* package (30) in R 4.1.0 (R Core Team, 2021).  
163 The variance among groups was compared conducting PERMANOVA (999 permutations) based on  
164 euclidean distance with the *vegan* (31) followed by Bonferroni-adjusted pairwise comparisons with the  
165 *RVAideMemoire* (32).

166

## 167 **DNA extraction**

168 DNA was extracted from gut, culture, biofilm and faeces pellets, water filters and food using the  
169 ZymoBIOMICS DNA Miniprep kit (Zymo Research, California). Prior to DNA extraction, all pellets were  
170 re-suspended in Eppendorf tubes with 750  $\mu\text{L}$  of the ZymoBIOMICS™ lysis solution, then the contents were  
171 transferred to the ZR BashingBead™ lysis tubes. Water filters were cut into pieces then transferred to the ZR  
172 BashingBead™ lysis tubes. All steps were conducted following the manufacturer's instructions except for  
173 mechanical lysis, achieved on a bead beater (TissueLyser II, Qiagen) during 6x1 min. An extraction blank  
174 was performed as a control. The quality and quantity of the extracted DNA was tested on Q-bit (Thermo).

175

## 176 **Bacterial 16S rRNA gene sequencing and analyses**

177 The V4-V5 variable region of the 16S rRNA gene was amplified using 479F (5'-  
178 CAGCMGCYGCNGTAANAC-3') and 888R primers (5'-CCGYCAATTCMTTTRAGT-3') (33), and  
179 sequenced (Illumina MiSeq paired-end, 2x250 bp, GenoScreen, France). Paired-end reads were  
180 demultiplexed, quality controlled, trimmed and assembled with FLASH (34). Sequence analysis was  
181 performed using the QIIME 2 2020.11 pipeline (35). Chimeras were removed and sequences were trimmed  
182 to 367 pb then denoised using the *DADA2* plugin, resulting in Amplicon Sequence Variants (ASVs) (36).  
183 ASVs were affiliated from the SILVA database release 138 (37) using the *feature-classifier* plugin and  
184 *classify-sklearn* module (38, 39). Sequences assigned as Eukaryota, Archaea, Mitochondria, Chloroplast and  
185 Unassigned were removed from the dataset then the sample dataset was rarefied to a list of 6,978 sequences.  
186 Alpha- and beta-diversity analyses were performed using the *phyloseq* (40), *vegan* and *RVAideMemoire*  
187 packages in R. Linear mixed models (LMMs) were used to compare species richness among the five

188 treatments and the three replicate aquaria within each treatment at d28, using the *MuMIn* (41) and *lmerTest*  
189 (42) R packages. We adapted the LMMs to the non-independency of individuals within each replicate, and  
190 defined the replicates as random effects and the five treatments as fixed effects, according to the formula  
191  $Y \sim \text{treatment} + (1 | \text{treatment} : \text{aquarium})$ . Principal coordinates analyses (PCoA) based on weighted and  
192 unweighted UniFrac distances were performed to examine the dissimilarity of bacterial composition between  
193 groups. Among- and within-group variance levels were compared using PERMANOVA (999 permutations)  
194 and PERMDISP (999 permutations), respectively. Differentially abundant taxa across groups were identified  
195 using the linear discriminant analysis (LDA) effect size (LEfSe) tool (43) in the Galaxy workspace (44)  
196 (<http://huttenhower.sph.harvard.edu/lefse/>). Default parameters were applied except for the LDA score  
197 threshold and for the different multi-class strategy (one-against-all).

198

### 199 **Microbiome-metabolome integrative analysis**

200 The integration of datasets, *i.e.* the area-under-the-peaks in metabolite profiles and the ASV counts  
201 describing the bacterial communities in the same sample, was performed using the *mixOmics* package in R.  
202 Pareto scaling was applied on the metabolome data, and a centred log-ratio transformation then a pre-  
203 filtering keeping only abundant ASVs, (*i.e.* representing at least 1% of the reads in at least one sample), were  
204 applied on the microbiome data. Following unsupervised analyses on each dataset, completed to explore and  
205 visualize any similar changes according to treatments, the integration was carried out. A supervised  
206 Projection to Latent Structures Discriminant Analysis (PLS-DA) was performed using DIABLO (*Data*  
207 *Integration Analysis for Biomarker discovery using Latent cOmponent*) (45), enabling to identify highly-  
208 correlated variables (metabolites and ASVs) also discriminating the different treatments. The integration of  
209 both datasets was realised using the full weighted design matrix and the *block.plsda* function implemented  
210 in *mixOmics*. The *plotDiablo* function enabled to check the well maximized covariation between datasets by  
211 displaying a Pearson correlation score. Then, relevance networks displaying the most discriminant covariates  
212 (metabolites, ASVs) were produced using the *network* function with Pearson correlation cut-offs (46).

213

### 214 **Metagenomic sequencing and analysis**

215 Shotgun metagenome sequencing was performed on DNA from 10 gut samples collected at d28, 5 in  
216 treatment d28\_0 and 5 from d28\_100 (Illumina HiSeq, 2x150bp, GenoScreen, France). Reads corresponding  
217 to animal sequences were identified by aligning each dataset against *Oryzias latipes* available at the NCBI,  
218 using BMap/bbsplit (47), and discarded. Remaining reads from each sample were assembled using  
219 metaSPAdes with default parameters (48). Scaffolds were first taxonomically annotated using Contig  
220 Annotation Tool (CAT) (49) and Kaiju (50) allowing to detect sequences from *O. latipes* retroviruses and  
221 *Microcystis* genome which were then discarded. All scaffolds were clustered using MyCC (51) (k-mer size =  
222 4, minimal sequence size = 1000) and bins were taxonomically annotated using Bin Annotation Tool(49).  
223 Completeness of bins was assessed using CheckM (52). Relative abundance of bins in each sample were also  
224 determined using BMap. Significant bins between the two treatments were determined using Wilcoxon  
225 rank-sum test. Finally, coding sequences predicted by Prodigal (53) were functionally annotated using



226 eggNOG-emapper (54). Resulting KEGG annotations were used as input to MinPath (55) in order to obtain  
227 the complementary MetaCyc pathway information.

228

## 229 **Results**

230

### 231 **Monitoring of experiments**

232 *Oryzias latipes* fish were maintained in suitable and stable conditions, and no fish died during the whole  
233 experimentation (Fig. 1 and Dataset S2). During the first 28-days long exposure (d0-d28), concentrations of  
234 *Microcystis aeruginosa* in the three treatments (d28\_1, d28\_10 and d28\_100) corresponded to expected  
235 levels,  $1.0 \pm 0.2$ ,  $10.0 \pm 0.8$  and  $100.2 \pm 7.8 \mu\text{g.L}^{-1}$  Chla, respectively. Microcystin levels in water were  $0.4 \pm$   
236  $0.0$  and  $10.4 \pm 2.1 \mu\text{g MC-LR eq.L}^{-1}$  in the d28\_10 and d28\_100 treatments, respectively, while microcystin  
237 was below detection level ( $< 0.15 \mu\text{g.L}^{-1}$ ) in d28\_1. During the second *M. aeruginosa* exposure (d33-d39),  
238 fish were exposed to  $102.8 \pm 2.9 \mu\text{g.L}^{-1}$  Chla and  $11.2 \pm 2.8 \mu\text{g MC-LR eq.L}^{-1}$ . The metabolic content of  
239 *Microcystis aeruginosa* cultures was examined (see Supplementary Note 2 and Table S1). Histopathological  
240 analyses did not reveal noticeable visual differences in fish liver tissue, with little to no carbohydrate  
241 reserves, and no lipofuscin and macrophagic hemosiderin.

242

### 243 **Diversity and composition of the gut bacterial microbiota after 28 days of exposure**

244 At d28, gut communities display between 42 and 219 ASVs with higher average bacterial richness ( $136 \pm 56$   
245 ASVs) and evenness (0.556) reported in fish guts exposed to d28\_Z8, and lower average bacterial richness  
246 ( $82 \pm 25$  ASVs) and evenness (0.391) in the treatment d28\_0 (Dataset S4). Gut-associated species richness  
247 was highest in the d28\_Z8 treatment (LMM,  $p < 0.05$ ), while no differences are observed among replicates  
248 within each treatment (LMM,  $p > 0.05$ ). The Shannon index increases slightly with *Microcystis*  
249 concentration (d28\_1: 2.09, d28\_10: 2.14, d28\_100: 2.28). Visual comparisons on individual plots of  
250 principal coordinates analyses (PCoA) based on the weighted or unweighted UniFrac distances suggest  
251 changes occur in terms of both abundances as well as community membership when fish are exposed to  
252 *M. aeruginosa* (d28\_1, d28\_10, d28\_100) or d28\_Z8 compared to d28\_0 (Fig. 2a,b). Bacterial community  
253 composition appears different among treatments (PERMANOVA, weighted UniFrac,  $p < 0.001$ ), notably  
254 between d28\_100 and the other four treatments ( $p < 0.01$ ), as well as between d28\_0 and d28\_Z8, d28\_1 and  
255 d28\_100 ( $p < 0.02$ ), but not between d28\_Z8, d28\_1 and d28\_10 ( $p > 0.23$ ). In addition, levels of variance in  
256 the different treatments are not significantly different (PERMDISP,  $p > 0.19$ ).

257

258 In treatment d28\_0 (water-exposed control), Fusobacteriota ( $50 \pm 16\%$ ), Firmicutes ( $28 \pm 15\%$ ),  
259 Proteobacteria ( $10 \pm 6\%$ ) and Bacteroidota ( $5 \pm 3\%$ ) dominate the microbiota, altogether representing  $92.8 \pm$   
260  $6.9\%$  of the reads. Relative abundances of these phyla are different among other treatments. Notably,  
261 Firmicutes are far less abundant in d28\_100 ( $3 \pm 2\%$ ) compared to other treatments (d28\_0:  $28 \pm 15\%$ ,  
262 d28\_Z8:  $28 \pm 15\%$ , d28\_1:  $41 \pm 14\%$ , d28\_10:  $36 \pm 12\%$ ) (Fig. 2c).

263 Many ASVs display significant differences across treatments in their relative abundances (Fig. 2e and Fig.  
264 S2a). We focus on the six dominant ASVs, *i.e.* representing at least 10% of reads in at least one sample,  
265 accounting from 11 to 72% of the reads. ASV1349, ASV1564 and ASV2363 exhibit lower relative  
266 abundances in d28\_0 (average below 0.7%). ASV1349 (*Flavobacterium*) and ASV1564 (*Aeromonas*) are  
267 more abundant in d28\_Z8 ( $7.6 \pm 10\%$  and  $3.8 \pm 3.5\%$ , respectively) and d28\_100 ( $4.2 \pm 4.1\%$  and  $6.2 \pm$   
268  $2.9\%$ , respectively). ASV2363 (*Reyranelia*) is also more abundant in d28\_100 ( $5.8 \pm 11.1\%$ ). ASV1662  
269 affiliated to the genus *ZOR0006*, is the main Firmicutes (96-100% of all Firmicutes reads), and as previously  
270 mentioned, is least abundant in d28\_100 compared to other treatments (Fig. 2d). ASV2042 (*Romboutsia*),  
271 dominant in a single sample (17.8%) while below 3.5% in all others, was not further considered. Finally,  
272 ASV1644 (unassigned Bacteria) displays similar abundances in treatments d28\_0 ( $5.6 \pm 6.0\%$ ) and d28\_100  
273 ( $7.2 \pm 9.7\%$ ) but is much less abundant in treatment d28\_1 ( $0.7 \pm 1.2\%$ ). Aside from the dominant ASVs that  
274 vary, ASV1620 (*Cetobacterium*) displays non-significant differences in abundance among treatments,  
275 representing  $48 \pm 16\%$  of reads in d28\_0 and average 27% to 46% of reads in other treatments.

276

### 277 **Metagenome-based comparison of gut communities in d28\_0 and d28\_100**

278 Metagenome datasets obtained from 5 fish guts from d28\_0 and 5 others from d28\_100 yielded negligible  
279 amounts of Archaea and non-fish Eukaryota sequences. Among the 32 bacterial bins obtained, 11 are found  
280 to be differentially abundant between the two treatments ( $p < 0.05$ , Wilcoxon rank-sum test) (Fig. S2b).  
281 Eight are more abundant in d28\_100, including seven assigned to the same taxa as ASVs (*Flavobacterium*,  
282 *Aeromonas*, *Gemmobacter*, Rhizobiales), and vary in the same way as ASV counts (Fig. S2a,b). Of the 3 bins  
283 found significantly more abundant in d28\_0, bin24 is affiliated to the Firmicutes, with a majority of coding  
284 sequences associated to *ZOR0006* (58.06%), the genus corresponding to aforementioned ASV1662.  
285 Gene functions were investigated by analysing enzymes (KO) potentially produced by bins and their  
286 associated pathways. Bins can be distinguished into three groups according to Wilcoxon rank-sum test  
287 performed ( $p$ -value fixed at 5%) between treatments d28\_0 and d28\_100 (Fig. S2c). Only 0.3% of enzymes  
288 are specific to the three bins that are more abundant in d28\_0. Altogether, bin24 (*ZOR0006*), bin22  
289 (Bacteroidales) and bin11 (Porphyromonadaceae) count 6 specific enzymes, including one involved in  
290 lactose degradation (KO2788). On the other hand, 4.3% of enzymes are specifically found in the 8 bins that  
291 are enriched in d28\_100 (namely bin9, bin10, bin12, bin16, bin19, bin23, bin25, bin26). These represent 95  
292 specific enzymes, including 14 involved in the biosynthesis of secondary metabolites, 10 in porphyrin and  
293 chlorophyll metabolism, and 6 in the biosynthesis of cofactors. The analysis of clusters of orthologous  
294 groups (COGs), regardless of their annotation status, reveals that 963 of them (4.4% of the total COGs) are  
295 specific to the three bins that are the most abundant in d28\_0, and that 2316 others (10.7% of the total gene  
296 families) are specific to the 8 bins that are the most abundant in d28\_100. However, one should notice that  
297 most of these COGs carry no known functional annotation, compromising our understanding of the influence  
298 of gene content variations on microbiota functioning based on metagenomic assumption.

299

### 300 **Gut metabolome variation and integration with gut microbiota composition after 28 days of exposure**



301 A total of 1,674 metabolites were detected across gut samples at d28. The PCA analysis separates the  
302 metabolite profiles of fish exposed to the different *M. aeruginosa* levels (d28\_1, d28\_10, d28\_100) along the  
303 first axis, while the second axis mostly separates d28\_0 from other treatments (Fig. 3a). The gut metabolite  
304 composition is different among treatments (PERMANOVA, euclidean distance,  $p < 0.001$ ), between d28\_0  
305 and the three *M. aeruginosa* treatments ( $p = 0.01$ ), and between d28\_100 and all treatments ( $p < 0.03$ ) but  
306 d28\_10 ( $p = 0.19$ ). Treatments d28\_Z8, d28\_1 and d28\_10 do not display differences ( $p > 0.3$ ). No  
307 significant variation is observed among treatments in livers ( $p = 0.13$ ) (Fig. S3a). In muscles, differences  
308 occur ( $p < 0.001$ ) especially between d28\_0 and both d28\_Z8 and d28\_1 ( $p = 0.01$ ), and between d28\_100  
309 and all other treatments ( $p = 0.01$ ) except d28\_0 ( $p = 0.33$ ) (Fig. S3b).

310  
311 A joint analysis of gut metabolites and bacterial communities was performed, as described by Singh and  
312 colleagues (45). The application of this multi-omics method has required the initial development of a new  
313 protocol for the extraction of both metabolites and DNA from the single gut samples of very small  
314 organisms. The resulting combined dataset consists of two matrices of the 70 abundant ASVs, *i.e.*  
315 representing at least 1% of reads in at least one sample, and the 1674 metabolites, sufficiently well correlated  
316 together (76%) to explore associations between ASVs and metabolites. The relevance network illustrates  
317 correlations between the most highly associated ASVs and metabolites discriminating among the five  
318 treatments. Four ASVs (ASV1349, ASV1564, ASV475, ASV1995) appear negatively correlated with several  
319 metabolites and are the least abundant in d28\_0 (Fig. 2e and Fig. 3b,c). Differently, the two other ASVs,  
320 namely ASV1543 (*Epulopiscium*) and ASV2350 (Barnesiellaceae), are positively correlated with few  
321 metabolites and are the most abundant in d28\_0 (Fig. 3b,c). Unfortunately, only few of the metabolites  
322 presenting high correlation with abundant ASVs could be annotated, and these mainly corresponded to amino  
323 acids or small peptides (Dataset S5).

324

### 325 **Diversity and composition of the gut bacterial microbiome and metabolome after depuration (d33) and** 326 **a second exposure (d39)**

327 After d28, fish from all 5 treatments were transferred to clean water (Fig. 1). At d33, some specimens were  
328 sampled, while others were transferred to a second exposure to *M. aeruginosa* ( $100 \mu\text{g.L}^{-1}$  Chla), then  
329 sampled at d39. The species richness of gut-associated communities decreases between d28 and d33 (over 82  
330 versus  $50 \pm 24$  ASVs), then increases at d39 ( $76 \pm 22$  ASV). The PCoA discriminates between gut  
331 communities from fish exposed to  $100 \mu\text{g.L}^{-1}$  Chla (d28\_100 and d39) and other treatments (Fig. S4a).  
332 Community compositions differ among treatments (PERMANOVA, weighted UniFrac,  $p < 0.001$ ).  
333 Treatment d33 differs from all other treatments ( $p < 0.05$ ) except for d28\_0 ( $p = 0.063$ ); in other words,  
334 bacterial communities at d33 are mostly similar to those observed in the d28\_0 treatment. Communities at  
335 d39 differ from all other treatments ( $p < 0.05$ ), except for d28\_100 ( $p = 0.063$ ); indicating that bacterial  
336 communities at d39 are similar to those from the d28 treatment exposed to the highest bloom intensity.  
337 Variance differs among treatments (PERMDISP,  $p < 0.01$ ), particularly between d33 and all other treatments  
338 ( $p < 0.05$ ), and between d39 and treatments d33 and d28\_Z8 ( $p < 0.05$ ), with d33 and d39 displaying lower

339 variance. Some phyla are present in similar abundances at d33 and d39, including Fusobacteriota ( $62 \pm 8\%$   
340 and  $66 \pm 14\%$ , respectively), Proteobacteria ( $12 \pm 6\%$  and  $19 \pm 9\%$ ) and Bacteroidota ( $9 \pm 3\%$  and  $7 \pm 3\%$ ,  
341 Fig. 4a,b). Firmicutes, again mostly consisting of ASV1662, are present at d33 and almost absent at d39  
342 ( $15.4 \pm 6.4\%$  versus  $0.8 \pm 1.8\%$ ). Other significant changes have been observed in specific ASVs between  
343 d33 and d39 (Fig. S5a) among which seven were already observed to vary between the different d28  
344 treatments (Fig. 2e and Fig. S2a). Interestingly, ASV1620 (*Cetobacterium*), that was found abundant and  
345 stable among the different d28 treatments, is still remarkably stable at d33 and d39 ( $58.8 \pm 7.4\%$  and  $61.7 \pm$   
346  $13.2\%$ ).

347 The gut metabolite profiles are significantly different among treatments (PERMANOVA, euclidean distance,  
348  $p < 0.001$ , Fig. S4b), especially between d33 and all treatments ( $p < 0.05$ ) except d28\_Z8 and d28\_1, as well  
349 as between d39 and all others ( $p < 0.05$ ) except d28\_Z8 and d28\_10. Contrary to bacterial microbiota  
350 composition, the d33 metabolomes are overall different from d28\_0, and those of d39 are different from  
351 d28\_100. A good correlation (81%) was observed between the gut ASVs and the metabolites discriminating  
352 between d33 and d39 when investigating the two matrices, containing 31 abundant ASVs and 1674  
353 metabolites, respectively. The relevance network notably revealed two ASVs, belonging to genus *Vibrio*  
354 (ASV1406, ASV2161), that are negatively correlated with numerous metabolites, while two ASVs,  
355 belonging to genus *Reyranelia* (ASV1030, ASV2363) appear positively correlated with numerous  
356 metabolites (Fig. S5b). No differences occur among treatments in liver samples ( $p > 0.05$ , Fig. S4c). In  
357 muscles, metabolomes at d33, d39 and d28\_100 appear similar ( $p > 0.10$ ), but different from all other  
358 treatment groups (Fig. S4d).

359

### 360 **Occurrence of dominant ASVs in compartments other than gut**

361 Dominant ASVs were searched for in fish food, *M. aeruginosa* culture, water, biofilm, and faeces (Fig. S6).  
362 ASV1620 (*Cetobacterium*) is most abundant in guts ( $44.3 \pm 20.4\%$ ) then in faeces ( $28.6 \pm 15.3\%$ ), congruent  
363 with its best matches in the database which are fish gastrointestinal bacteria (zebrafish, Nile Tilapia).  
364 ASV1349 (*Flavobacterium*) and ASV1564 (*Aeromonas*) are most abundant in faeces ( $8.8 \pm 9.6\%$  and  $7.8 \pm$   
365  $2.8\%$ , respectively), then guts ( $2.1 \pm 4.4\%$  and  $3.4 \pm 2.6\%$ , respectively) and biofilms ( $2.0 \pm 3.3\%$  and  $3.4 \pm$   
366  $2.5\%$ , respectively). This is congruent with their respective BLAST<sub>N</sub> hits with bacteria from fish intestinal  
367 tracts or aquatic environments. ASV1644 (unassigned Bacteria) is also most abundant in faeces ( $10.7 \pm$   
368  $7.4\%$ ), then in guts ( $3.7 \pm 6.6\%$ ), but could not be assigned taxonomically. The Firmicutes ASV1662  
369 (*ZOR0006*) mainly occurs in guts ( $19.3 \pm 16.9\%$ ) and is slightly abundant in faeces ( $1.2 \pm 1.4\%$ ), in  
370 accordance with the habitat of its closest matches, namely fish intestinal bacteria. Finally, ASV2363  
371 (*Reyranelia*) is most abundant in biofilms ( $4.4 \pm 8.7\%$ ) compared to other compartments (water:  $2.2 \pm 6.3\%$ ;  
372 faeces:  $1.3 \pm 2.7\%$ ; guts:  $1.2 \pm 4.1\%$ ), and is related to various environmental bacteria.

373

### 374 **Discussion**

375

376 Results from the 28-days exposure indicate that *Microcystis aeruginosa* blooms modify the fish gut bacterial  
377 microbiota compositions and have different effects on different taxa. Firmicutes, a phylum commonly found  
378 in gut bacterial communities of vertebrates and very likely implied in host metabolism processes (56–58),  
379 appear particularly sensitive as they decrease sharply upon exposure to the highest bloom intensity.  
380 Firmicutes were largely represented by a single bacterium (Erysipelotrichaceae\_ZOR0006) that was almost  
381 absent outside of gut samples, suggesting being an indigenous and resident symbiont of *O. latipes* gut.  
382 Kaakoush and colleagues (59) have previously discussed the central role of Erysipelotrichaceae in host lipid  
383 metabolism and health in relation to diet specificities. The ZOR0006 genus has already been observed to  
384 decrease in fish gut microbiota after exposing zebrafish 21 days to high concentrations of antibiotics or  
385 fungicides (60, 61). Interestingly, the drop of ZOR0006 abundance observed in this study occurs at a level  
386 between 10 and 100  $\mu\text{g.L}^{-1}$  Chla. Together with the observation of the greater influence of the highest bloom  
387 condition on the whole gut community, this suggests the existence of a cyanobacterial bloom threshold above  
388 which the gut microbiota composition is particularly altered. On the other hand, some abundant gut bacteria  
389 appear stable throughout the bloom, and even during the depuration and second exposure, the most  
390 remarkable being the bacterium affiliated to *Cetobacterium* (Fusobacteria). This genus is generally  
391 associated with healthy fish microbiota and notably contributes to host health as a B<sub>12</sub> vitamin producer (62–  
392 64). *Cetobacterium* is most likely a fish gut resident and has previously been reported stable in medaka fish  
393 upon exposure to pure microcystin-LR and cell extract of the *Microcystis* strain (24), supporting its  
394 maintenance through the exposure to cyanobacterial bloom and respective metabolites. Finally, relative  
395 abundances of other bacteria increase during the *Microcystis* bloom. These may be transient gut bacteria that  
396 might originate from grazed biofilms and proliferate once established in the gut, or be rare gut taxa that can  
397 take advantage of peculiar conditions to proliferate. In our study, some of these opportunistic bacteria,  
398 corresponding to *Flavobacterium*, *Aeromonas* and *Shewanella*, are common inhabitants of fish guts or the  
399 environment, or potential fish gut pathogens according to the literature (65–67). A similar increase of  
400 opportunistic bacteria was recently documented in guts of zebrafish exposed 96h to *M. aeruginosa* (10). As  
401 previously shown for several metabolite mixtures from cyanobacterial cell extracts (24), exposure to whole  
402 cyanobacterial cells thus has a major impact on gut community compositions, indicating that fish microbiota  
403 might be impacted during the bloom as well as after bloom senescence which causes the release of the  
404 cyanobacterial cell contents into the surrounding water (68). However, only the highest concentration of the  
405 bloom and/or its cell extract, that was explored in the present study, could induce most evident microbiota  
406 changes, suggesting that the microbiota responsiveness might be dose dependent. The cyanobacterial strain  
407 PMC 728.11 contains various secondary metabolites that may be responsible for variations in fish gut  
408 microbiota. Among those already identified and specifically those potentially produced by the strain (24, 69),  
409 cyanopeptides, such as aerucyclamides and bacteriocins, are thought to exhibit potent antimicrobial or  
410 cytotoxic bioactivities (70, 71), and could directly impact the microbiota during *Microcystis* cell digestion  
411 into the intestine lumen.  
412

413 Metagenome-based investigation confirms the variations of taxa abundances, but very few taxa-specific  
414 known (*i.e.* annotated) functions were identified for the bacteria that displayed the highest abundance  
415 variations, including for the Firmicutes. This is at first consistent with the common claim that a change in  
416 microbiota composition does not necessarily imply a change in the functions as estimated by gene content  
417 (72, 73). However, similar genes are not necessarily expressed in the same way in different bacterial taxa,  
418 and thus phenotypes might still change dramatically despite the potential occurrence of similar gene  
419 contents. Indeed, variations in metabolite profiles reveal obvious functional variations induced by the  
420 different treatments, in particular changes in gut metabolite composition associated with increasing bloom  
421 concentrations. These changes could thus be related to unannotated COGs, much more numerous among the  
422 differentially abundant bacteria compared to annotated KO, or could result from variations in the expression  
423 of metabolic pathways in the holobiont. Whatsoever, the remarkable correlation observed between some  
424 dominant bacteria and many metabolites supports that the response of gut microbiota composition and that of  
425 the holobiont's gut metabolome are linked. Gut community disruption is associated with metabolic changes,  
426 especially in the presence of higher bloom levels, suggesting the occurrence of a potential dysbiotic state.  
427 However, this crosstalk between gut bacteria and metabolites remains difficult to characterize. For example,  
428 the presence of pathogens enhanced by bloom-induced toxicological impairs of fish physiology could  
429 secondarily affect the holobiont gut metabolism. Alternatively, the variation of the quantity of some gut  
430 metabolites could allow the development of opportunistic pathogens, as reported in mammals (74, 75).  
431 Interestingly, variations of metabolite composition in muscles and livers remains limited in comparison to  
432 those observed in the gut, implying that the gut metabolome compartment is more responsive to the  
433 *Microcystis aeruginosa* exposure. This observation is congruent with the fact that the gut is more directly  
434 exposed to the surrounding environment, through ingestion of water that contains various organisms and  
435 their associated compounds, and emphasizes the relevance of investigating the gut microbiota, as the gut  
436 epithelium sits at the interface between the host and its environment (21, 22). Changes in microbiome and  
437 overall holobiont functions seem to be deeply linked, despite that the respective contribution of the host and  
438 the bacteria community cannot yet be disentangled and will require further dedicated functional analysis  
439 (76).

440  
441 After the first 28-days bloom, depuration in clear water seems to have restored, to a certain extent, gut  
442 microbiota compositions. Indeed, compositions at d33 tended to resemble those of naïve specimens, not  
443 previously exposed to *M. aeruginosa* or to Z8 (d28\_0). This indicates that the gut community composition is  
444 resilient, even over a relatively short time. The following second high-intensity bloom on the other hand  
445 yielded bacterial communities resembling those of specimens exposed to the first high-intensity bloom  
446 (d28\_100), including the disappearance of Firmicutes and the stability of *Cetobacterium*. This indicates that  
447 a short duration bloom (5 days) already has a strong effect. Gut communities thus quickly respond to the  
448 presence or absence of *M. aeruginosa* and associated bioactive compounds. Effects of the first and the  
449 second bloom are however not strictly identical. Firmicutes for example show reproducible behaviour,  
450 disappearing upon first and second bloom, and seem to quickly re-establish post-bloom, suggesting they are

451 not resistant, but remarkably resilient. However, the relative abundance of other taxa (including  
452 *Flavobacterium*, *Reyranella*, *Shewanella*), whose abundance increased upon the 28 days bloom, did not  
453 increase during the second 5-days exposure. It remains here difficult to compare variations of most non-  
454 dominant bacteria between d33 and d39 because of the substantial inter-individual variation of microbiota  
455 composition, combined with the limited sample size in terms of individual number per condition, compared  
456 to d28 conditions. Stress associated with specimen handling, the transfer of fish to newly cleaned aquaria  
457 after 28 days, has previously been referenced as a moderate, but possible, source of stress (77) and also could  
458 be involved to a certain extent in some of the differences. Contrary to gut community compositions, the  
459 metabolite composition in fish guts after the depuration and the second exposure did not tend towards those  
460 observed in unexposed and highest bloom at d28, respectively. So, metabolite compositions do not linearly  
461 follow the trends found in community compositions. This also suggests that the depuration and the second  
462 exposure may have been too prompt to induce major shifts in the gut metabolome, as these compartments  
463 may present different kinetics. Thus, the dynamics of gut microbiota and metabolome are very likely not  
464 identical, and the microbiota composition may somehow respond to changes faster than the metabolome. If  
465 confirmed by further investigation, this would suggest that very short blooms occurring in nature, despite  
466 their temporary spectacular effect on microbiota composition, may have more limited functional  
467 consequences for the holobiont homeostasis (78, 79).

468

## 469 **Conclusions**

470 Overall, this study emphasizes that cyanobacterial blooms should be considered as potent dysbiosis-  
471 triggering events for fish gut microbiota and holobiont functions. Additionally, the drop of Firmicutes  
472 abundance induced by *M. aeruginosa* bloom which threshold level would be comprised between 10 and  
473  $100 \mu\text{g}\cdot\text{L}^{-1}$  Chla, together with the observation of a greater influence of higher bloom condition (100) on the  
474 overall gut community, support the existence of a notable tipping point for the responsiveness of gut  
475 microbiome to cyanobacterial bloom intensity. This finding could have important eco(toxico)logical  
476 consequences, as these levels are commonly reached in natural ecosystems during typical *Microcystis* bloom  
477 episodes worldwide, suggesting that destabilization of fish gut communities might be a very common event  
478 (26). In nature, cyanobacterial blooms are nowadays becoming increasingly frequent (3), and sometimes  
479 persistent among seasons. Freshwater fish, especially those living in shallow water ponds, face numerous  
480 bloom episodes of varying durations during their lifetime. Consequences of iterative (up to chronic)  
481 exposures on the holobiont should be explored. Indeed, successive blooms without enough recovery time  
482 could induce a cumulative drift of the gut microbiota and metabolome, leading to suboptimal states that may  
483 lead to host health impairment (80). This phenomenon could be of major significance for fish health in  
484 eutrophic natural ecosystems as well as aquaculture ponds where cyanobacteria often proliferate. Testing the  
485 effects of a single live *M. aeruginosa* strain administrated by simple balneation on a model teleost fish is a  
486 first step towards understanding bloom effects on fish microbiota and holobiont health. In the future,  
487 particular attention should also be paid to the natural diversity of cyanobacterial within blooms, as successive  
488 blooms often involve different species that produce different metabolite cocktails (81).

489

490 **Declarations**

491 **Ethics approval and consent to participate**

492 Experiments were conducted according to best practices within the framework of an authorized program  
493 (APAFiS#19316-2019032913284201 v1) approved by Ethical Committee of the National Museum of  
494 Natural History (Paris) CEEA n°68.

495

496 **Consent for publication**

497 Not applicable.

498

499 **Availability of data and materials**

500 16S rRNA gene sequencing and shotgun raw data are deposited into the GenBank SRA database under the  
501 BioProject PRJNA746242 (samples SAMN20080275 to SAMN20080438). Files with metabolite tables from  
502 mass spectrometry analyses, and the rarefied table of ASVs will be available upon acceptance of the  
503 manuscript. The detailed protocol for the extraction of metabolites and DNA will be deposited on  
504 protocols.io upon acceptance of the manuscript. The full R code and QIIME 2 script will be available on  
505 Zenodo upon acceptance of the manuscript.

506

507 **Competing Interest Statement**

508 The authors declare that they have no competing interests.

509

510 **Funding**

511 Research was funded by ATM 3M and 3M2 from the MNHN and by AcSymb project from the Institut  
512 Universitaire de France. AG's PhD fellowship was funded by the "Ecole doctorale ED227" (MNHN-SU).

513

514 **Author's contributions**

515 S.D. and B.M. conceived the study. A.G., C.D., S.D. and B.M. conceived the experiment. A.G. and C.D.  
516 conducted the experiment. S.D. and B.M. took part in the experiment. H.H. conducted histological data  
517 processing and analyses. A.G. and C.D. conducted molecular data processing. A.G., S.H., S.D. and B.M.  
518 analysed data. A.G., S.D. and B.M. wrote the manuscript. S.H. edited the manuscript. All authors contributed  
519 and agreed on the contents.

520

521 **Acknowledgements**

522 Kandiah Santhirakumar managed fish maintenance, Claude Yéprémian advised on cyanobacterial cultivation  
523 and Arthus Escalas helped with statistical analyses. We thank the Amagen platform for providing medaka  
524 fish, ENVA for histological data processing, the PtSMB platform of MNHN for metabolomics.

525

526 **References**



1. K. E. Havens, Chapter 33: Cyanobacteria blooms: effects on aquatic ecosystems. 15 (2008).
2. S. Pavagadhi, R. Balasubramanian, Toxicological evaluation of microcystins in aquatic fish species: Current knowledge and future directions. *Aquat. Toxicol.* **142–143**, 1–16 (2013).
3. J. Huisman, *et al.*, Cyanobacterial blooms. *Nat. Rev. Microbiol.* **16**, 471–483 (2018).
4. A. Escalas, *et al.*, Drivers and ecological consequences of dominance in periurban phytoplankton communities using networks approaches. *Water Res.* **163**, 114893 (2019).
5. J. M. O’Neil, T. W. Davis, M. A. Burford, C. J. Gobler, The rise of harmful cyanobacteria blooms: The potential roles of eutrophication and climate change. *Harmful Algae* **14**, 313–334 (2012).
6. H. W. Paerl, T. G. Otten, Harmful Cyanobacterial Blooms: Causes, Consequences, and Controls. *Microb. Ecol.* **65**, 995–1010 (2013).
7. C. Malbrouck, P. Kestemont, Effects of microcystins on fish. *Environ. Toxicol. Chem.* **25**, 72 (2006).
8. S. Singh, B. N. Kate, U. C. Banerjee, Bioactive Compounds from Cyanobacteria and Microalgae: An Overview. *Crit. Rev. Biotechnol.* **25**, 73–95 (2005).
9. B. Marie, *et al.*, Effects of a toxic cyanobacterial bloom (*Planktothrix agardhii*) on fish: Insights from histopathological and quantitative proteomic assessments following the oral exposure of medaka fish (*Oryzias latipes*). *Aquat. Toxicol.* **114–115**, 39–48 (2012).
10. H. Qian, *et al.*, Effects of different concentrations of *Microcystis aeruginosa* on the intestinal microbiota and immunity of zebrafish (*Danio rerio*). *Chemosphere* **214**, 579–586 (2019).
11. S. R. Saraf, *et al.*, Effects of Microcystis on development of early life stage Japanese medaka (*Oryzias latipes*): Comparative toxicity of natural blooms, cultured *Microcystis* and microcystin-LR. *Aquat. Toxicol.* **194**, 18–26 (2018).
12. B. Sotton, *et al.*, Global metabolome changes induced by cyanobacterial blooms in three representative fish species. *Sci. Total Environ.* **590–591**, 333–342 (2017).
13. S. Le Manach, *et al.*, Physiological effects caused by microcystin-producing and non-microcystin producing *Microcystis aeruginosa* on medaka fish: A proteomic and metabolomic study on liver. *Environ. Pollut.* **234**, 523–537 (2018).
14. Q. Qiao, *et al.*, An integrated omic analysis of hepatic alteration in medaka fish chronically exposed to cyanotoxins with possible mechanisms of reproductive toxicity. *Environ. Pollut.* **219**, 119–131 (2016).
15. B. Ernst, B. Hitzfeld, D. Dietrich, Presence of *Planktothrix* sp. and cyanobacterial toxins in Lake Ammersee, Germany and their impact on whitefish (*Coregonus lavaretus* L.). *Environ. Toxicol.* **16**, 483–488 (2001).
16. B. W. Ibelings, I. Chorus, Accumulation of cyanobacterial toxins in freshwater “seafood” and its consequences for public health: A review. *Environ. Pollut.* **150**, 177–192 (2007).
17. A. R. Wang, C. Ran, E. Ringø, Z. G. Zhou, Progress in fish gastrointestinal microbiota research. *Rev. Aquac.* **10**, 626–640 (2018).
18. S. P. Claus, H. Guillou, S. Ellero-Simatos, The gut microbiota: A major player in the toxicity of environmental pollutants? *Npj Biofilms Microbiomes* **2** (2016).
19. Y. Jin, S. Wu, Z. Zeng, Z. Fu, Effects of environmental pollutants on gut microbiota. *Environ. Pollut.* **222**, 1–9 (2017).

20. C. S. Rosenfeld, Gut Dysbiosis in Animals Due to Environmental Chemical Exposures. *Front. Cell. Infect. Microbiol.* **7** (2017).
21. L. Evariste, *et al.*, Gut microbiota of aquatic organisms: A key endpoint for ecotoxicological studies. *Environ. Pollut.* **248**, 989–999 (2019).
22. S. Duperron, S. Halary, A. Gallet, B. Marie, Microbiome-Aware Ecotoxicology of Organisms: Relevance, Pitfalls, and Challenges. *Front. Public Health* **8** (2020).
23. Y. Duan, *et al.*, Effects of *Microcystis aeruginosa* and microcystin-LR on intestinal histology, immune response, and microbial community in *Litopenaeus vannamei*. *Environ. Pollut.* **265**, 114774 (2020).
24. S. Duperron, *et al.*, Response of Fish Gut Microbiota to Toxin-Containing Cyanobacterial Extracts: A Microcosm Study on the Medaka (*Oryzias latipes*). *Environ. Sci. Technol. Lett.* **6**, 341–347 (2019).
25. J. Li, *et al.*,  $\mu$ Evaluation of microcystin-LR absorption using an in vivo intestine model and its effect on zebrafish intestine. *Aquat. Toxicol.* **206**, 186–194 (2019).
26. M. J. Harke, *et al.*, A review of the global ecology, genomics, and biogeography of the toxic cyanobacterium, *Microcystis* spp. *Harmful Algae* **54**, 4–20 (2016).
27. R. Rippka, “[1] Isolation and purification of cyanobacteria” in *Methods in Enzymology*, (Elsevier, 1988), pp. 3–27.
28. C. Yéprémian, *et al.*, “Chlorophyll a Extraction and Determination” in *Handbook of Cyanobacterial Monitoring and Cyanotoxin Analysis*, (John Wiley & Sons, Ltd, 2016), pp. 331–334.
29. S. Le Manach, *et al.*, Global Metabolomic Characterizations of *Microcystis* spp. Highlights Clonal Diversity in Natural Bloom-Forming Populations and Expands Metabolite Structural Diversity. *Front. Microbiol.* **0** (2019).
30. F. Rohart, B. Gautier, A. Singh, K.-A. L. Cao, mixOmics: An R package for ‘omics feature selection and multiple data integration. *PLOS Comput. Biol.* **13**, e1005752 (2017).
31. J. Oksanen, *et al.*, vegan: Community Ecology Package. R package version 2.5-7 (2020).
32. M. Hervé, RVAideMemoire: Testing and Plotting Procedures for Biostatistics. R package version 0.9-79 (2021).
33. S. Terrat, *et al.*, Molecular biomass and MetaTaxogenomic assessment of soil microbial communities as influenced by soil DNA extraction procedure. *Microb. Biotechnol.* **5**, 135–141 (2012).
34. T. Magoč, S. L. Salzberg, FLASH: fast length adjustment of short reads to improve genome assemblies. *Bioinformatics* **27**, 2957–2963 (2011).
35. E. Bolyen, *et al.*, Reproducible, interactive, scalable and extensible microbiome data science using QIIME 2. *Nat. Biotechnol.* **37**, 852–857 (2019).
36. B. J. Callahan, P. J. McMurdie, S. P. Holmes, Exact sequence variants should replace operational taxonomic units in marker-gene data analysis. *ISME J.* **11**, 2639–2643 (2017).
37. C. Quast, *et al.*, The SILVA ribosomal RNA gene database project: improved data processing and web-based tools. *Nucleic Acids Res.* **41**, D590–D596 (2013).
38. F. Pedregosa, *et al.*, Scikit-learn: Machine Learning in Python. *Mach. Learn. PYTHON*, 6.

39. N. A. Bokulich, *et al.*, Optimizing taxonomic classification of marker-gene amplicon sequences with QIIME 2's q2-feature-classifier plugin. *Microbiome* **6**, 90 (2018).
40. P. J. McMurdie, S. Holmes, phyloseq: An R Package for Reproducible Interactive Analysis and Graphics of Microbiome Census Data. *PLOS ONE* **8**, e61217 (2013).
41. K. Bartoń, MuMIn: Multi-Model Inference. R package version 1.43.17 (2020).
42. A. Kuznetsova, P. B. Brockhoff, R. H. B. Christensen, lmerTest Package: Tests in Linear Mixed Effects Models. *J. Stat. Softw.* **82**, 1–26 (2017).
43. N. Segata, *et al.*, Metagenomic biomarker discovery and explanation. *Genome Biol.* **12**, R60 (2011).
44. J. Goecks, A. Nekrutenko, J. Taylor, The Galaxy Team, Galaxy: a comprehensive approach for supporting accessible, reproducible, and transparent computational research in the life sciences. *Genome Biol.* **11**, R86 (2010).
45. A. Singh, *et al.*, DIABLO: an integrative approach for identifying key molecular drivers from multi-omics assays. *Bioinformatics* **35**, 3055–3062 (2019).
46. I. González, K.-A. L. Cao, M. J. Davis, S. Déjean, Visualising associations between paired ‘omics’ data sets. *BioData Min.* **5**, 19 (2012).
47. B. Bushnell, “BBMap: A Fast, Accurate, Splice-Aware Aligner” (Lawrence Berkeley National Lab. (LBNL), Berkeley, CA (United States), 2014) (May 26, 2021).
48. A. Bankevich, *et al.*, SPAdes: A New Genome Assembly Algorithm and Its Applications to Single-Cell Sequencing. *J. Comput. Biol. J. Comput. Mol. Cell Biol.* **19**, 455–77 (2012).
49. F. A. B. von Meijenfeldt, K. Arkhipova, D. D. Cambuy, F. H. Coutinho, B. E. Dutilh, Robust taxonomic classification of uncharted microbial sequences and bins with CAT and BAT. *Genome Biol.* **20**, 217 (2019).
50. P. Menzel, K. L. Ng, A. Krogh, Fast and sensitive taxonomic classification for metagenomics with Kaiju. *Nat. Commun.* **7**, 11257 (2016).
51. H.-H. Lin, Y.-C. Liao, Accurate binning of metagenomic contigs via automated clustering sequences using information of genomic signatures and marker genes. *Sci. Rep.* **6**, 24175 (2016).
52. D. H. Parks, M. Imelfort, C. T. Skennerton, P. Hugenholtz, G. W. Tyson, CheckM: assessing the quality of microbial genomes recovered from isolates, single cells, and metagenomes. *Genome Res.* **25**, 1043–1055 (2015).
53. D. Hyatt, *et al.*, Prodigal: prokaryotic gene recognition and translation initiation site identification. *BMC Bioinformatics* **11**, 1–11 (2010).
54. J. Huerta-Cepas, *et al.*, eggNOG 5.0: a hierarchical, functionally and phylogenetically annotated orthology resource based on 5090 organisms and 2502 viruses. *Nucleic Acids Res.* **47**, D309–D314 (2019).
55. Y. Ye, T. G. Doak, A Parsimony Approach to Biological Pathway Reconstruction/Inference for Genomes and Metagenomes. *PLOS Comput. Biol.* **5**, e1000465 (2009).
56. R. E. Ley, *et al.*, Obesity alters gut microbial ecology. *Proc. Natl. Acad. Sci.* **102**, 11070–11075 (2005).
57. R. E. Ley, P. J. Turnbaugh, S. Klein, J. I. Gordon, Human gut microbes associated with obesity. *Nature* **444**, 1022–1023 (2006).

58. X. Li, *et al.*, Gut Microbiota Contributes to the Growth of Fast-Growing Transgenic Common Carp (*Cyprinus carpio* L.). *PLOS ONE* **8**, e64577 (2013).
59. N. O. Kaakoush, Insights into the Role of Erysipelotrichaceae in the Human Host. *Front. Cell. Infect. Microbiol.* **5** (2015).
60. M. Qian, *et al.*, Sub-chronic exposure to antibiotics doxycycline, oxytetracycline or florfenicol impacts gut barrier and induces gut microbiota dysbiosis in adult zebrafish (*Danio rerio*). *Ecotoxicol. Environ. Saf.* **221**, 112464 (2021).
61. Z. Bao, *et al.*, Sub-chronic carbendazim exposure induces hepatic glycolipid metabolism disorder accompanied by gut microbiota dysbiosis in adult zebrafish (*Danio rerio*). *Sci. Total Environ.* **739**, 140081 (2020).
62. C. Tsuchiya, T. Sakata, H. Sugita, Novel ecological niche of *Cetobacterium somerae*, an anaerobic bacterium in the intestinal tracts of freshwater fish. *Lett. Appl. Microbiol.* **46**, 43–48 (2008).
63. T. Li, *et al.*, Bacterial Signatures of “Red-Operculum” Disease in the Gut of Crucian Carp (*Carassius auratus*). *Microb. Ecol.* **74**, 510–521 (2017).
64. C. Ma, C. Chen, L. Jia, X. He, B. Zhang, Comparison of the intestinal microbiota composition and function in healthy and diseased Yunlong Grouper. *AMB Express* **9**, 187 (2019).
65. N. Hayatgheib, E. Moreau, S. Calvez, D. Lepelletier, H. Pouliquen, A review of functional feeds and the control of *Aeromonas* infections in freshwater fish. *Aquac. Int.* **28**, 1083–1123 (2020).
66. T. P. Loch, M. Faisal, Emerging flavobacterial infections in fish: A review. *J. Adv. Res.* **6**, 283–300 (2015).
67. B. Austin, D. A. Austin, *Bacterial Fish Pathogens* (Springer International Publishing, 2016) <https://doi.org/10.1007/978-3-319-32674-0> (June 9, 2021).
68. S. Merel, *et al.*, State of knowledge and concerns on cyanobacterial blooms and cyanotoxins. *Environ. Int.* **59**, 303–327 (2013).
69. S. Halary, *et al.*, Draft Genome Sequence of the Toxic Freshwater *Microcystis aeruginosa* Strain PMC 728.11 (Cyanobacteria, Chroococcales). *Microbiol. Resour. Announc.* **9**, e01096-20, /mra/9/48/MRA.01096-20.atom (2020).
70. M. A. Riley, J. E. Wertz, Bacteriocin diversity: ecological and evolutionary perspectives. *Biochimie* **84**, 357–364 (2002).
71. J. Martins, V. Vasconcelos, Cyanobactins from Cyanobacteria: Current Genetic and Chemical State of Knowledge. *Mar. Drugs* **13**, 6910–6946 (2015).
72. A. Moya, M. Ferrer, Functional Redundancy-Induced Stability of Gut Microbiota Subjected to Disturbance. *Trends Microbiol.* **24**, 402–413 (2016).
73. S. Louca, *et al.*, Function and functional redundancy in microbial systems. *Nat. Ecol. Evol.* **2**, 936–943 (2018).
74. S. L. Vogt, J. Peña-Díaz, B. B. Finlay, Chemical communication in the gut: Effects of microbiota-generated metabolites on gastrointestinal bacterial pathogens. *Anaerobe* **34**, 106–115 (2015).
75. Z. Li, *et al.*, Effects of Metabolites Derived From Gut Microbiota and Hosts on Pathogens. *Front. Cell. Infect. Microbiol.* **8** (2018).

76. S. S. Fontaine, K. D. Kohl, Gut microbiota of invasive bullfrog tadpoles responds more rapidly to temperature than a noninvasive congener. *Mol. Ecol.* **29**, 2449–2462 (2020).
77. D. E. Portz, C. M. Woodley, J. J. Cech, Stress-associated impacts of short-term holding on fishes. *Rev. Fish Biol. Fish.* **16**, 125–170 (2006).
78. M. Gerphagnon, *et al.*, Microbial players involved in the decline of filamentous and colonial cyanobacterial blooms with a focus on fungal parasitism. *Environ. Microbiol.* **17**, 2573–2587 (2015).
79. E. Moreno-Ostos, L. Cruz-Pizarro, A. Basanta, D. G. George, The influence of wind-induced mixing on the vertical distribution of buoyant and sinking phytoplankton species. *Aquat. Ecol.* **43**, 271–284 (2009).
80. M. J. Blaser, Antibiotic use and its consequences for the normal microbiome. *Science* **352**, 544–545 (2016).
81. C. S. Reynolds, *The Ecology of Phytoplankton* (Cambridge University Press, 2006).

528 **Figures**

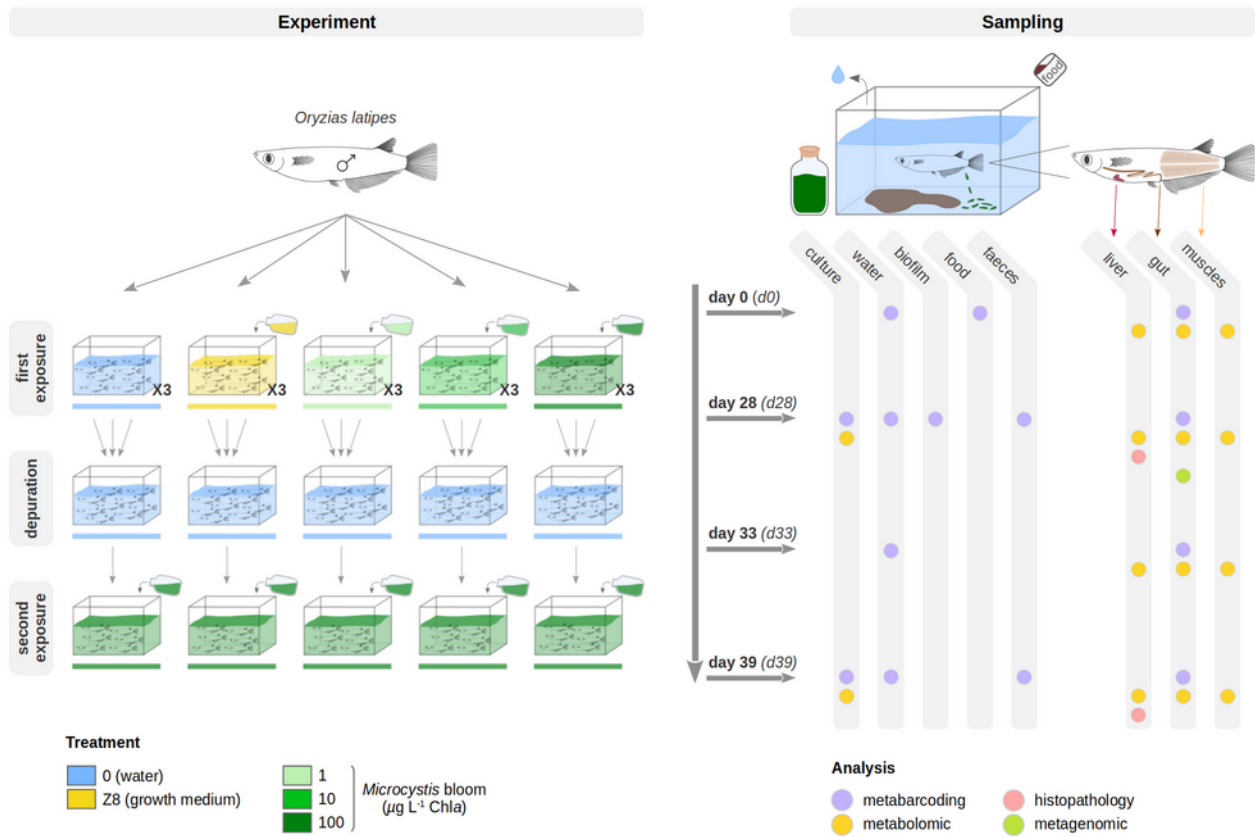

530 **Figure 1.** Experimental design and *O. latipes* sampling strategy. After a 14-days acclimatisation period, adult  
 531 male *O. latipes* were exposed to two successive exposures. During the first 28 days (d0 to d28), fish were  
 532 exposed to five different treatments, each carried out in three 10-liter aquaria. Treatments consisted of two  
 533 controls (0, Z8) and three concentrations of *Microcystis aeruginosa* (1, 10 and 100  $\mu\text{g.L}^{-1}$  Chla). After that, a  
 534 4-days depuration phase followed (d28 to d33) performed in clear water (0), then fish were exposed again for  
 535 5 days (d33 to d39) to *M. aeruginosa* (100  $\mu\text{g.L}^{-1}$  Chla). Colours represents the different treatments: blue =  
 536 water, yellow = Z8 growth medium, light green = 1  $\mu\text{g.L}^{-1}$  Chla, green = 10  $\mu\text{g.L}^{-1}$  Chla, dark green = 100  
 537  $\mu\text{g.L}^{-1}$  Chla. Samples were collected at d0 (day 0), d28 (day 28), d33 (day 33) and d39 (day 39). Further  
 538 analyses were performed on *M. aeruginosa* culture, water, biofilm, fish food, faeces samples and different  
 539 tissues (Supplementary Note 1 and Fig. S1a-d). Dataset S2 provides details on sampling counts.



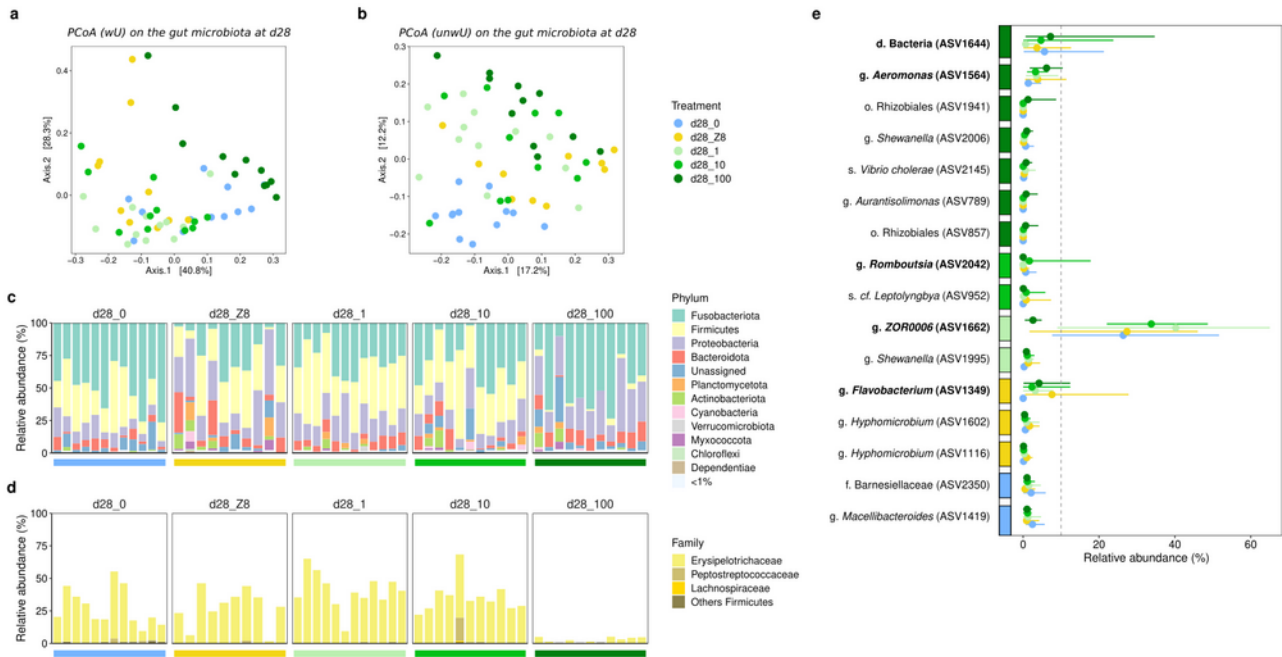

540 **Figure 2.** Changes in the composition of gut bacterial communities after 28 days of exposure. (a-b) PCoA  
 541 using the weighted (a) or unweighted (b) UniFrac distances on fish gut bacterial community in the five  
 542 treatments. (c) Relative abundance of bacterial phyla across treatments. (d) Relative abundance of Firmicutes  
 543 members (family level). Firmicutes are mainly represented by the Erysipelotrichaceae family, and a single  
 544 ASV (ASV1662). Coloured horizontal bars represent the different treatments (see Fig. 1). (e) Significant  
 545 ASVs from the Linear discriminant analysis (LDA) effect size (LEfSe) with a LDA score above 3.5, and  
 546 their relative abundances across d28 treatments. The coloured boxes on the y-axis represent the treatment  
 547 where each ASV is most abundant; dots represent the average relative abundance; line spreads over the range  
 548 of observed values. Only dominant ASVs, *i.e.* representing at least 10% of reads in at least one sample were  
 549 further considered.

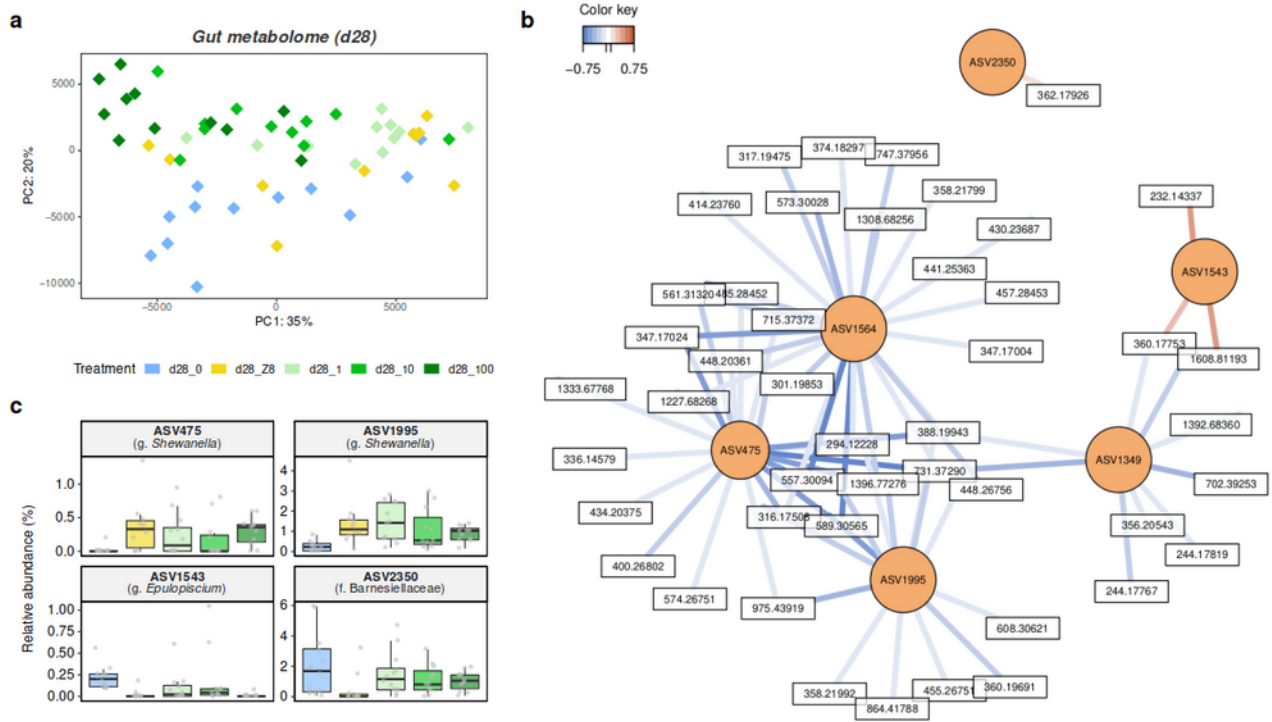

550 **Figure 3.** Modification of the gut metabolome composition associated with bacteria changes. (a) Principal  
551 component analysis (PCA) representing gut metabolite profiles at d28. (b) Relevance network analysis  
552 illustrating the most correlated metabolites (in white) and ASVs (in orange) discriminating among the five  
553 treatments. Only variables (ASVs, metabolites) with correlation values above  $\pm 0.695$  are displayed. Pearson  
554 correlations between covariate metabolites and ASVs are represented by coloured segments (blue: negative  
555 association, red: positive association). (c) Relative abundances of the four discriminant ASVs, displayed in  
556 the relevance network and not mentioned in previous analyses.

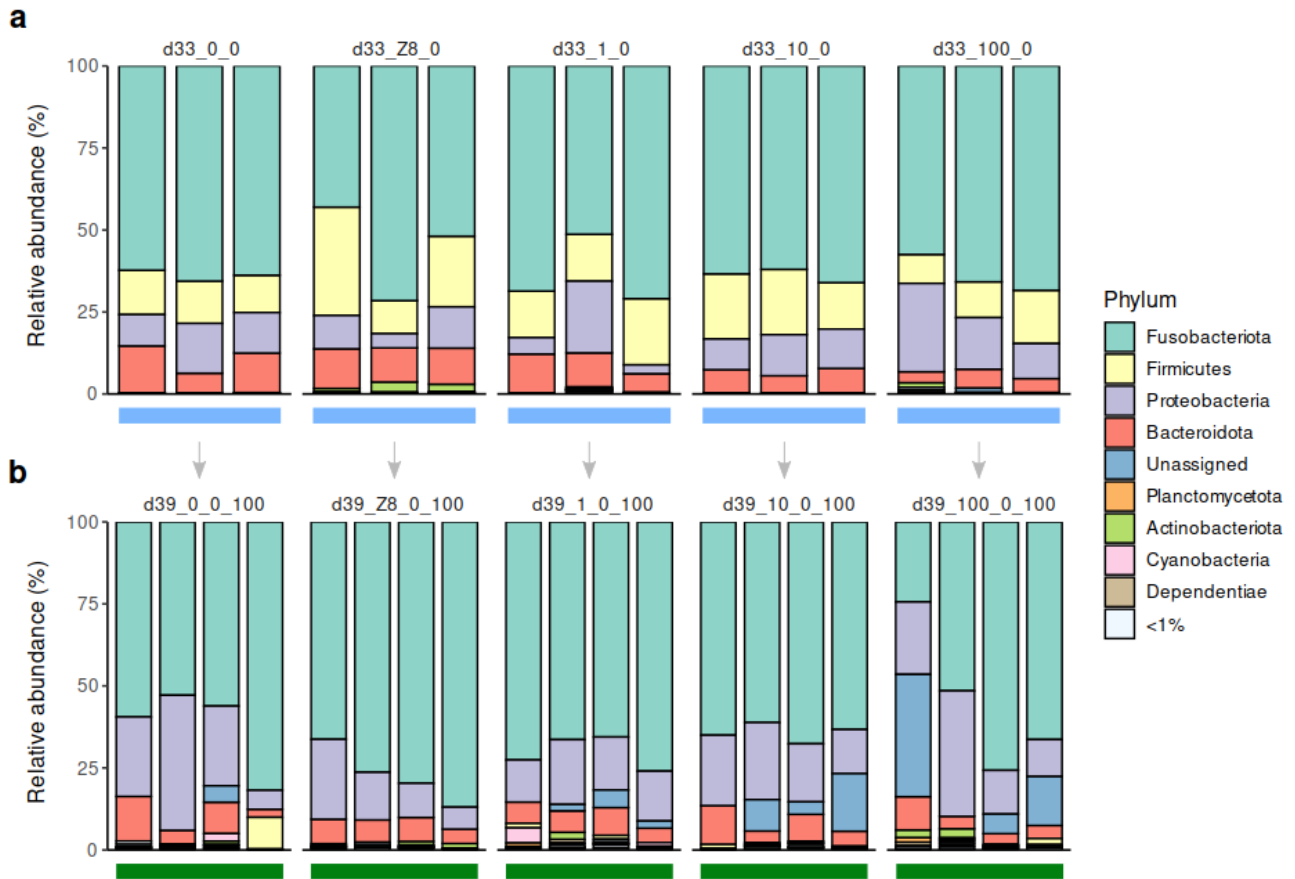

557 **Figure 4.** Depuration and a second *Microcystis* bloom impact the gut microbiota community. Relative  
558 abundance of gut bacterial phyla at d33, after 4 days in water following the d28 treatment (a), and at d39  
559 after 5 additional days exposed to *M. aeruginosa* (b). Coloured horizontal bars represent the different  
560 imposed treatments: blue = water, dark green = 100  $\mu\text{g.L}^{-1}$  Chla.

561

#### 562 **Additional Files**

563 Supplementary figures and notes 1 and 2

564 Supplementary notes 1 and 2, figures S1 to S6, and Table S1.

565 Dataset S1

566 Sampling counts during the whole experiment.

567 Dataset S2

568 Monitoring of abiotic and biotic parameters during the experiment.

569 Dataset S3

570 Annotations of metabolites from the *Microcystis aeruginosa* strain PMC 728.11.

571 Dataset S4

572 16S rRNA gene sequencing and quality filtered read counts, and measures of alpha-diversity metrics (species  
573 richness, shannon, evenness).

574 Dataset S5

575 Annotations of the most correlated metabolites with bacteria from fish guts at day 28.
